# Supplementary material for: A progesterone-brown fat axis is involved in regulating fetal growth
Source: PubMed Central journal article supplement (PMC5587669; doi:10.1038/s41598-017-10979-7), 2017-09-06
Supplement: 41598_2017_10979_MOESM1_ESM.pdf [file 41598_2017_10979_MOESM1_ESM.pdf]

## A progesterone-brown fat axis is involved in regulating fetal growth

Saraid McIlvride, Aleena Mushtaq, Georgia Papacleovoulou, Chloe Hurling, Jennifer Steel, Eugène

Jansen, Shadi Abu-Hayyeh and Catherine Williamson

### SUPPLEMENTARY INFORMATION

#### Supplementary Data

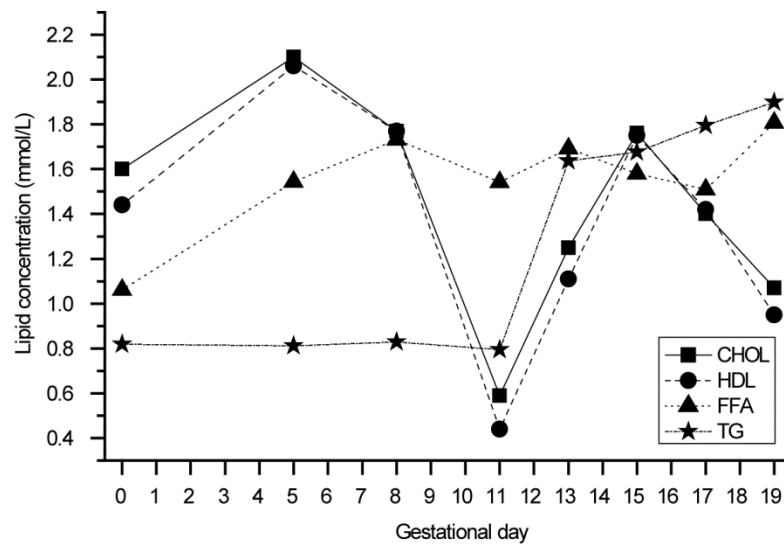

**Supplementary Figure S1. Switching of serum lipid biochemistry takes place at GD11 onwards**  
Serum concentrations of cholesterol (CHOL), HDL-cholesterol (HDL), free fatty acids (FFA) and triglycerides (TG). Pooled sampled serum from n=11 pregnant mice.

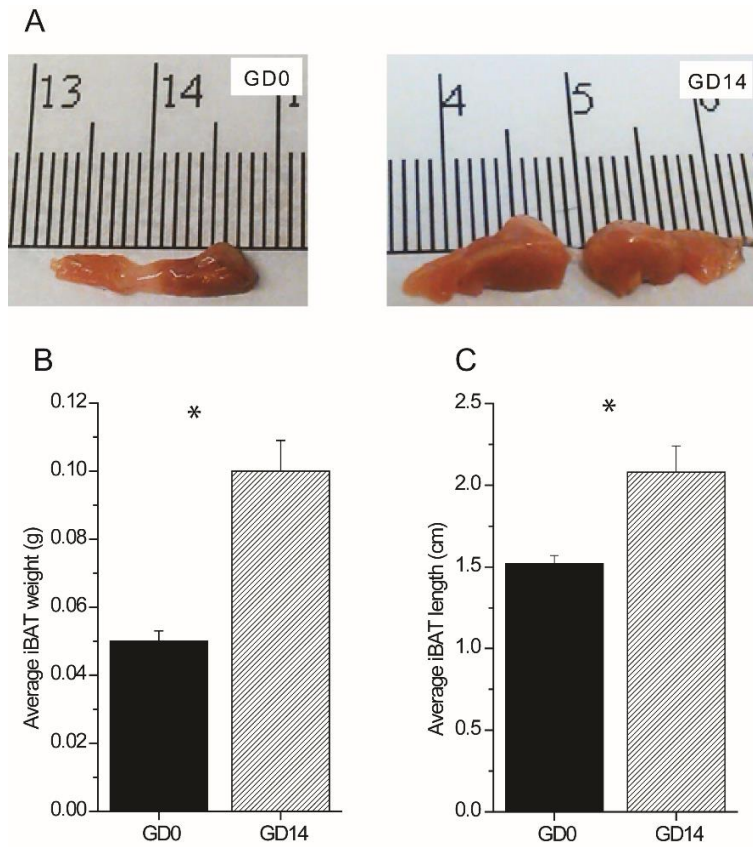

**Supplementary Figure S2. Pregnancy alters the morphometry of BAT**

Images of iBAT taken from non-pregnant (GD0) or day 14 pregnant (GD14) mice (A). Average iBAT weight (B) and length (C). Data represented as mean  $\pm$  SEM, n=5 per group. \*  $p < 0.05$  as determined by Student's t-test.

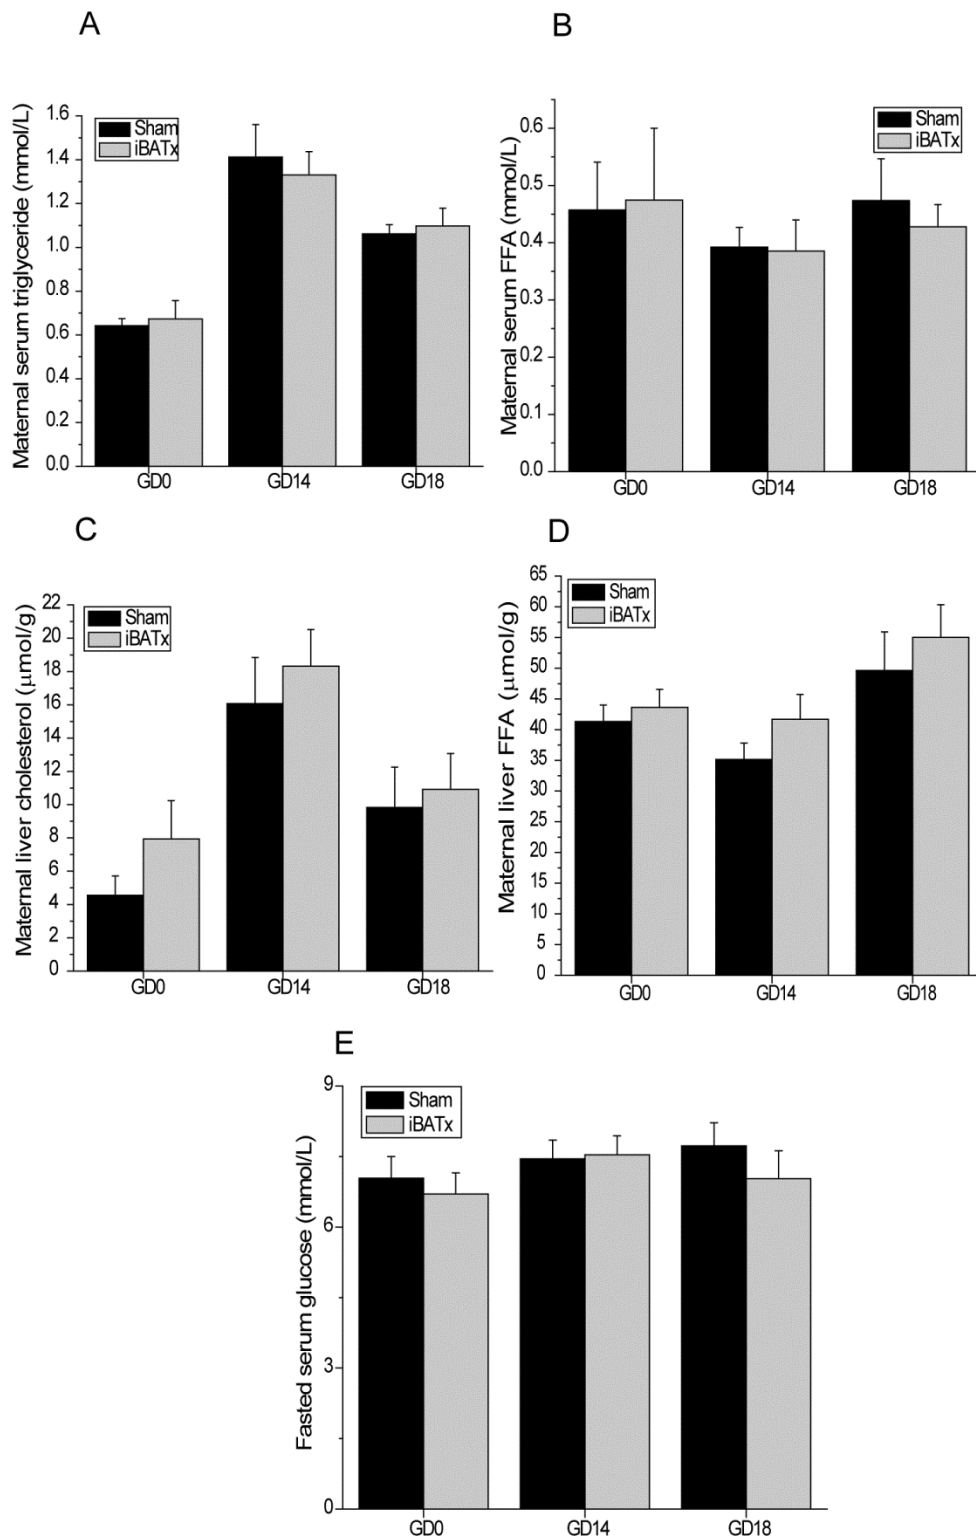

**Supplementary Figure S3. The effect of surgically ablating interscapular BAT on maternal biochemistry**

Lipid profiles of maternal (A) serum triglycerides, (B) serum free fatty acids (FFA), (C) liver cholesterol and (D) liver FFA. (E) Maternal fasted serum glucose. Data represented as mean  $\pm$  SEM, n=6-11 per group.

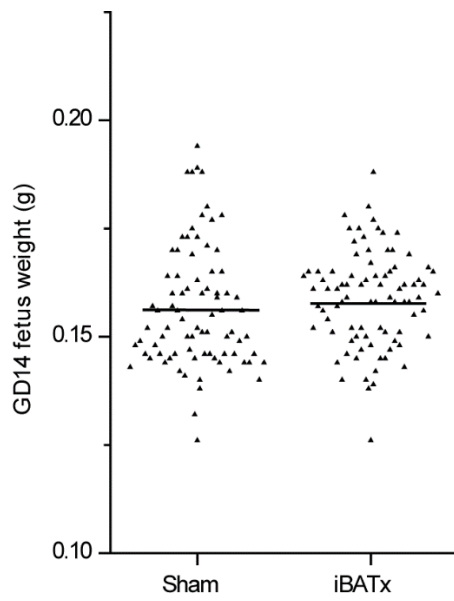

**Supplementary Figure S4. Surgical ablation of maternal interscapular BAT does not alter fetal weight at gestational day 14**

Sham / iBATx fetal weight: n=82 / 86 fetuses from 11 / 11 mothers.

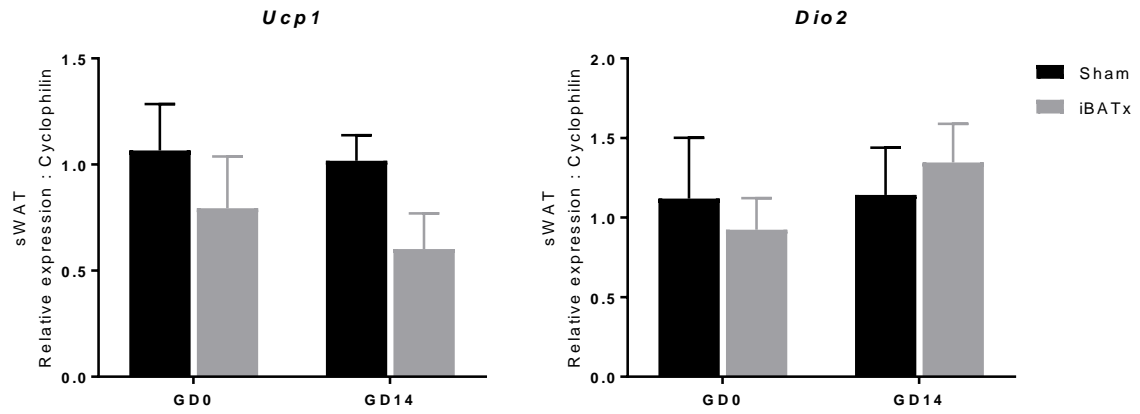

**Supplementary Figure S5. Surgical ablation of maternal interscapular BAT does not alter maternal subcutaneous WAT expression of BAT marker genes *Ucp1* and *Dio2***  
Data represented as mean  $\pm$  SEM, n=3-6 per group.

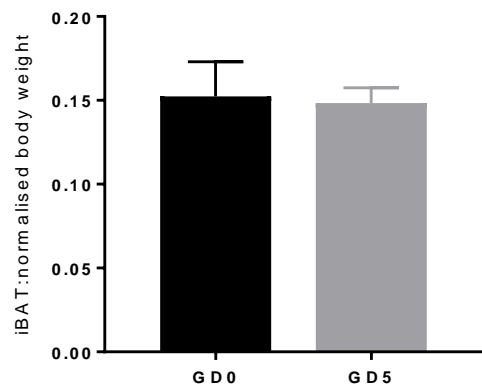

**Supplementary Figure S6. No changes in normalised iBAT weight at GD5**

Data represent mean  $\pm$ SEM, GD0 n=4, GD5, n=7.

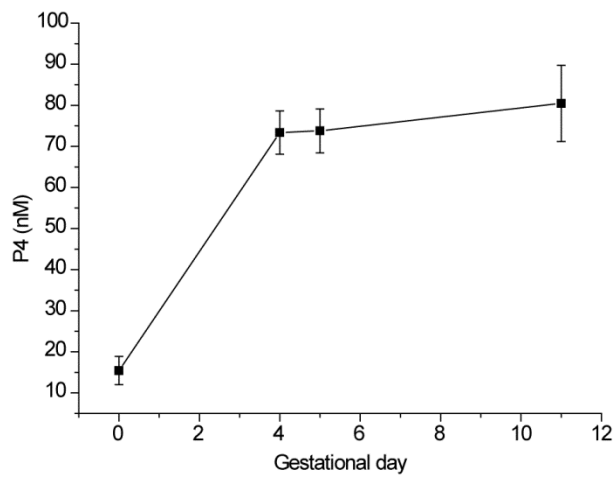

**Supplementary Figure S7. Serum progesterone concentrations increase rapidly following coitus**  
Data represented as mean  $\pm$ SEM, n=9-11.

Supplementary Experimental Procedures

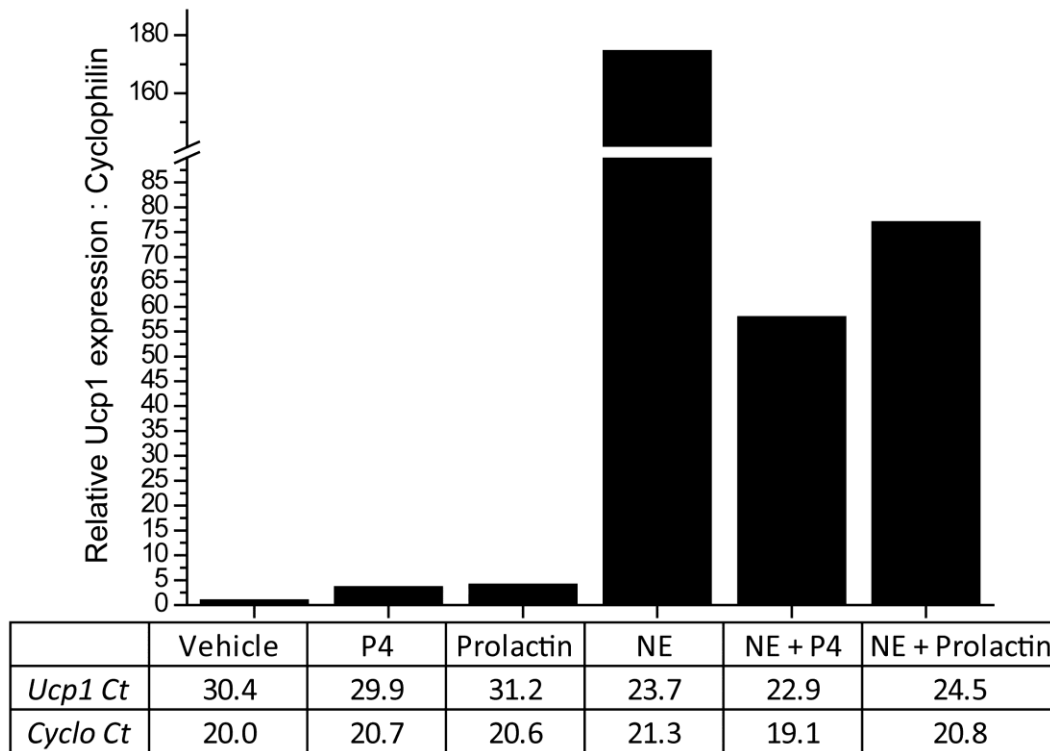

**Supplementary Figure S8. Representative example of *Ucp1* mRNA expression in cultured primary brown adipocytes +/- treatment with progesterone (P4), prolactin and norepinephrine (NE) (n=1).**

**Serum Progesterone Measurements.** The serum progesterone concentration in mice at GD0 to GD11 was measured using the HTRF progesterone assay kit (CisBio) following a 1:15 dilution in assay buffer, according to manufacturer's instructions.



**Table of Primer Sequences**

| <b>Gene</b>                 | <b>Forward Primer</b>      | <b>Reverse Primer</b>     |
|-----------------------------|----------------------------|---------------------------|
| <b><i>β-Actin</i></b>       | GATGACGATATCGCTGCGCTG      | CTAGGGCGGCCACGAT          |
| <b><i>Abca1</i></b>         | TCCTCATCCTCGTCATTCAA       | GGACTTGGTAGGACGGAACCT     |
| <b><i>Abcg1</i></b>         | GCTGTGCGTTTTGTGCTGTT       | TGCAGCTCCAATCAGTAGTCC     |
| <b><i>Abcg5</i></b>         | TCAATGAGTTTTACGGCCTGAA     | GCACATCGGGTGATTTAGCA      |
| <b><i>Abcg8</i></b>         | TGCCCACCTCCACATGTC         | ATGAAGCCGGCAGTAAGGTAG     |
| <b><i>Acc1</i></b>          | GGCCAGTGCTATGCTGAGAT       | AGGGTCAAGTGCTGCTCCA       |
| <b><i>Acc2</i></b>          | ACTTTGACCTGACCGCTGTG       | CTGAGTGCCGGATAATGGC       |
| <b><i>Adipoq</i></b>        | AGATGCAGGTCTTCTTGCTC       | CTGAGCGATACACATAAGCGG     |
| <b><i>Adrb3</i></b>         | GGTAATCATAGCCATCGCCC       | CAGTTACACAGAGCACGTCC      |
| <b><i>Adrp</i></b>          | TGGCAGCAGCAGTAGTGGAT       | AGCTCACCAAGGGCAGGTT       |
| <b><i>Cd36</i></b>          | GATGTGGAACCCATAACTGGA      | GGCTTGACCAATATGTTGACC     |
| <b><i>Cidea</i></b>         | AGAGTCACCTTCGACCTATACAG    | AACCTCAGCAGATTCTTAACAC    |
| <b><i>Cyp7a1</i></b>        | AGCAACTAAACAACCTGCCAGTACTA | GTCCGGATATTCAAGGATGCA     |
| <b><i>Cyclophilin B</i></b> | TGGAGAGCACCAAGACAGACA      | TGCCGGAGTCGACAATGAT       |
| <b><i>Dgat2</i></b>         | AGTGGCAATGCTATCATCATCGT    | AAGGAATAAGTGGGAACCCAGATCA |
| <b><i>Dio2</i></b>          | CCTACAAACAGGTTAAACTGGG     | CTCTGCACTGGCAAAGTC        |
| <b><i>El</i></b>            | AGCGTCTATTGTTACTTCCC       | TTTATGATGCTCATCTCGCAG     |
| <b><i>Fabp-pm</i></b>       | CAAAGATGCAGAAGAAGCC        | CCTCTTGCAACCATTGCT        |
| <b><i>Fas</i></b>           | CCCAGAGGCTTGTGCTGACT       | CGAATGTGCTTGGCTTGGT       |
| <b><i>Fatp1</i></b>         | CGTTTCGATGGTTATGTTAGTG     | CTAGCACGTCACCTGAGAG       |
| <b><i>Fatp4</i></b>         | TTCCCTCATCCTCCTGCT         | CGATGTTTCTGCTGAGTG        |
| <b><i>Hmgcr</i></b>         | TTGGCACCATGTGAGGCGTCC      | AGCGACACACAGGCCGGGAA      |
| <b><i>Hsl</i></b>           | CTATTCAGGGACAGAGGCAG       | TAGTTCCAGGAAGGAGTTGAG     |
| <b><i>Lal</i></b>           | TCTTCTCAAGGACATGTTTG       | CAAAGCTCCTTCATGATGAC      |
| <b><i>Lep</i></b>           | GTTCAAGCAGTGCCTATCC        | AAGTCCAAGCCAGTGACC        |
| <b><i>Lpl</i></b>           | CCAGGATGCAACATTGGAGA       | CAACTCAGGCAGAGCCCTTT      |
| <b><i>Lxra</i></b>          | AGGAGTGTGACTTCGCAAA        | CTCTTCTTGCCGCTTCAGTT      |
| <b><i>Lxrβ</i></b>          | AAGCAGGTGCCAGGGTTCT        | TGCATTCTGTCTCGTGGTTGT     |
| <b><i>mtCox2</i></b>        | TGCTCTCCCCTCTCTAC          | GGTGCCCTATGGTTTTAACG      |
| <b><i>Nd5</i></b>           | AGCATTGCGGAAGCATCTTTG      | TTGTGAGGACTGGAATGCTG      |
| <b><i>Pgc1a</i></b>         | TGAAAGGGCCAAACAGAGAGA      | TAAATCACACGGCGCTCTT       |
| <b><i>Scd1</i></b>          | CCCCTGCGGATCTTCCTTAT       | AGGGTTCGGGTGTGTTTCT       |
| <b><i>Scd2</i></b>          | AGCGGGCTGCAGAACTTAG        | GGCTGAGTAAGCGCCAGAGAT     |
| <b><i>Srebp1c</i></b>       | GCAGCCATGGATTGCACATT       | GGCCCGGAAGTCACTGT         |
| <b><i>Ucp1</i></b>          | AATACTGGCAGATGACGTCC       | TTACCACATCCACTGGAGAG      |
| <b><i>Zic1</i></b>          | CACATGAAGGTCCATGAGTCC      | GGGTTGTCTGTTGTGGGAG       |
